# Supplementary material
Source: publisher figshare collection journal article supplement (https://diabetesjournals.figshare.com/articles/dataset/_/20440290)
Supplement: Supplementary file 3 [file 1]

Rachel Wong, Rohith Vaddavalli, Margaret A. Hall, Monil V. Patel, Carolyn T. Bramante, Elena Casarighi<sup>1,2</sup>, Steven G. Johnson<sup>1</sup>, Veena Lingam<sup>1</sup>, Joshua D. Miller, Jane Reusch<sup>1</sup>, Mary Saltz<sup>1</sup>, Til Stürmer<sup>3</sup>, Jena S. Tronieri<sup>1,2</sup>, Kenneth J. Wilkins<sup>1,2</sup>, John B. Buse<sup>1,3,4</sup>, Joel Saltz, \*Jared D. Huling<sup>1</sup>,  
\*Richard Moffitt, N3C Consortium  
\* These authors contributed equally.

#### Collaborators

**N3C Consortium:** Adit Anand, Tellen Bennett, Christopher G. Chute, Peter DeWitt, Michael Evans, Victor Garcia, Kenneth Gersing, Andrew Girvin, Melissa Haendel, Jeremy R. Harper, Janos Hajagos, Stephanie Hong, Emily Pfaff, Jacob Wooldridge, Yun Jae Yoo
