# Supplementary material
Source: publisher figshare collection journal article supplement (https://diabetesjournals.figshare.com/articles/dataset/_/20440290)

**Supplement 5. Forest plot showing adjusted coefficients for post-index weight in COVID-19 positive and control patients with T2D (n=5804) accounting for informative censoring due to death or loss to follow up**

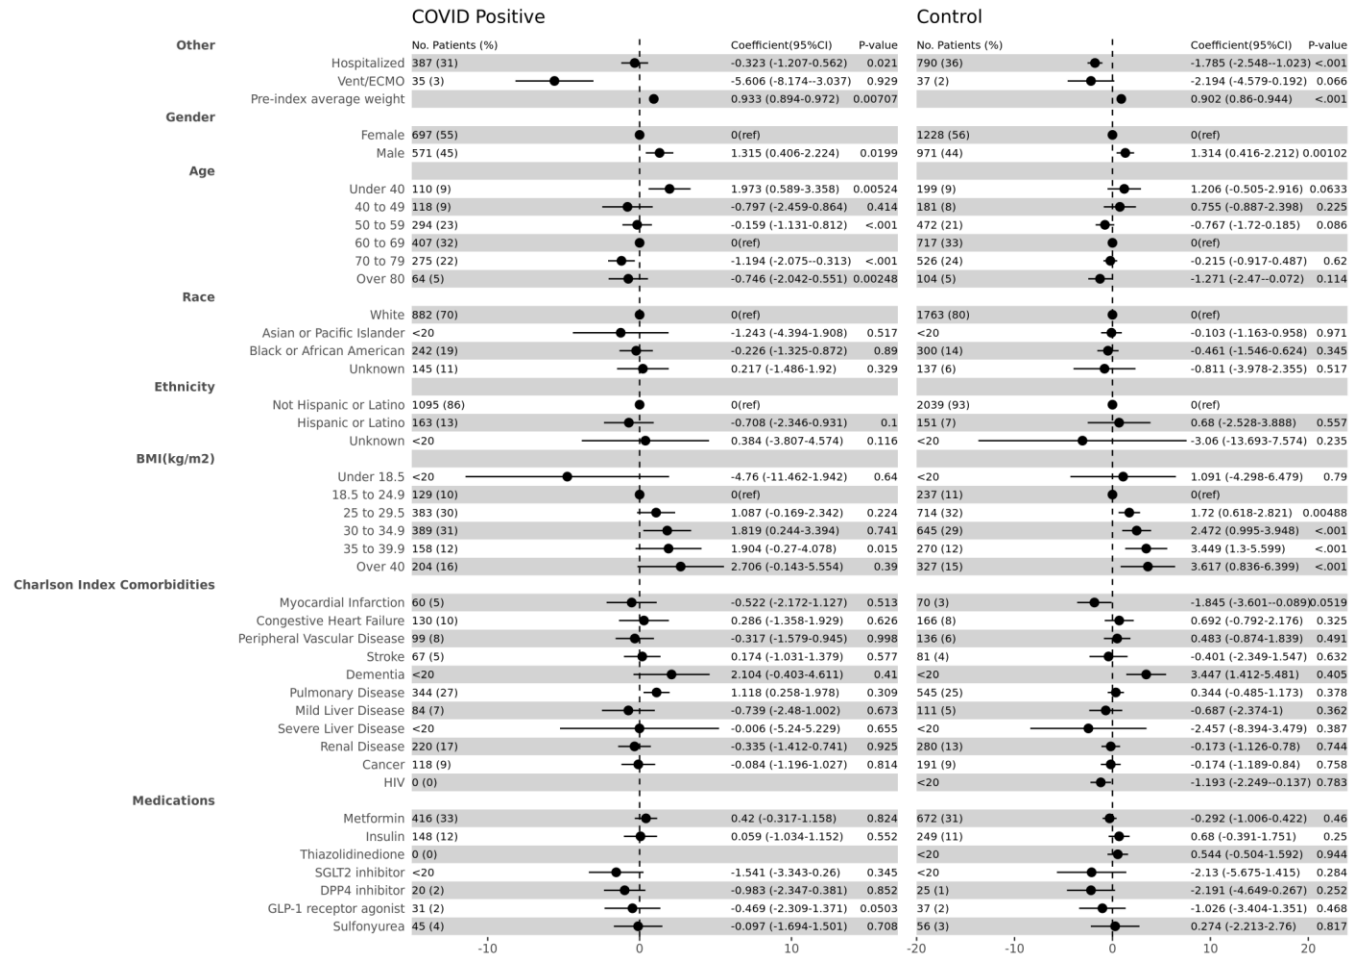

Supplement: Supplementary file 4 [file 1]
