# Supplementary material
Source: publisher figshare collection journal article supplement (https://diabetesjournals.figshare.com/articles/dataset/_/20440290)

### Supplement 3. Empirical cumulative distribution function plot of pre-index HbA1c before and after matching

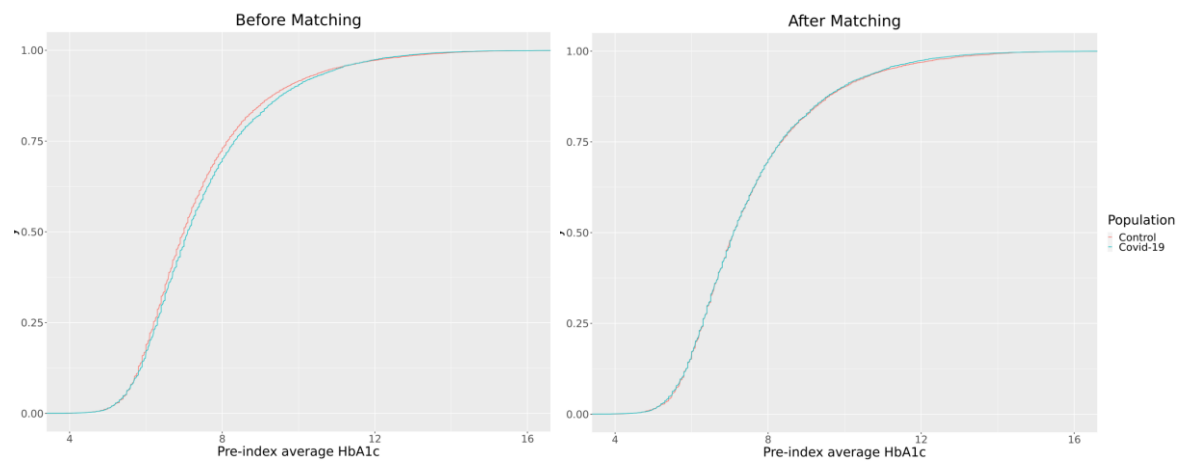

Supplement: Supplementary file 5 [file 1]
