# Supplementary material
Source: publisher figshare collection journal article supplement (https://diabetesjournals.figshare.com/articles/dataset/_/20440290)

Supplement 1. Love plot of propensity score covariate balance

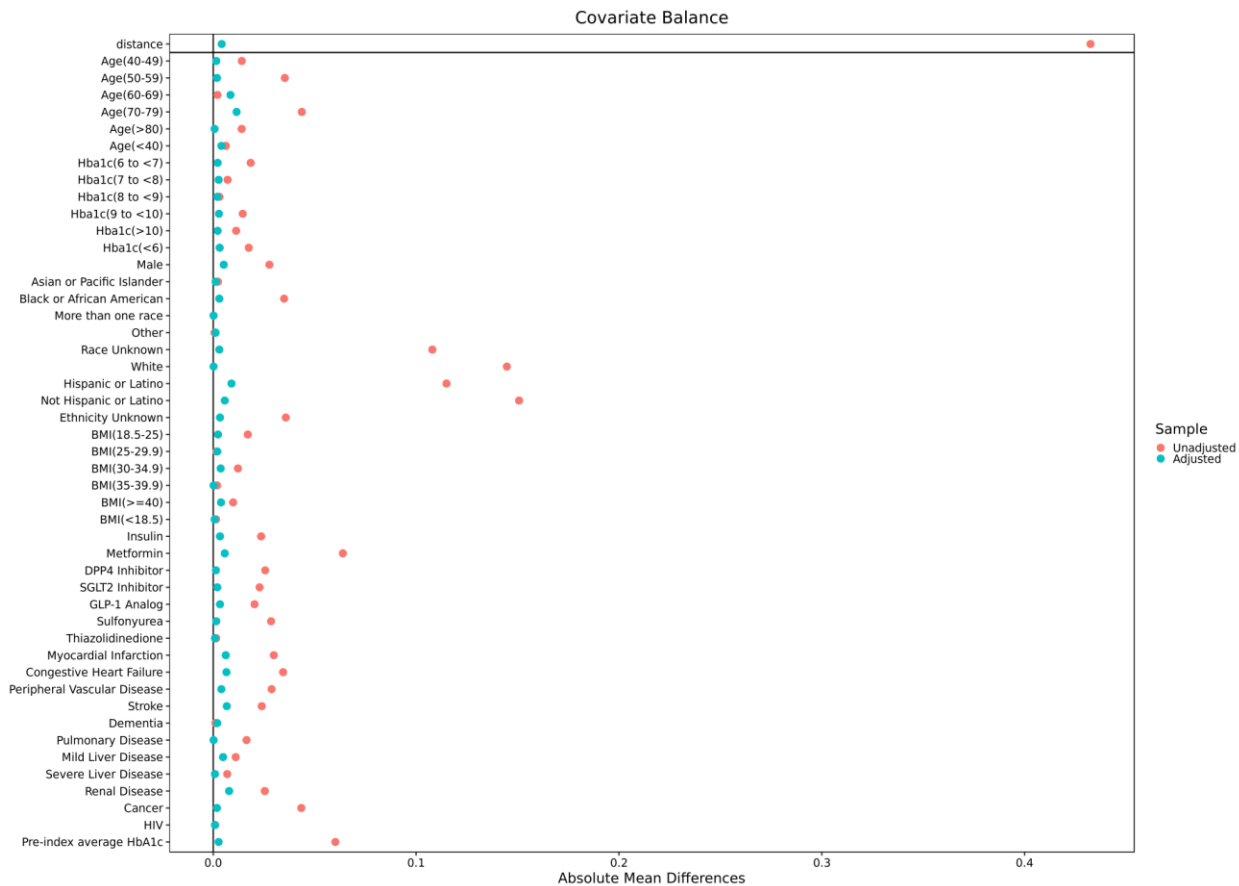

Supplement: Supplementary file 1 [file 1]

Supplement 2. Distributional balance of propensity scores in COVID-19 and control groups

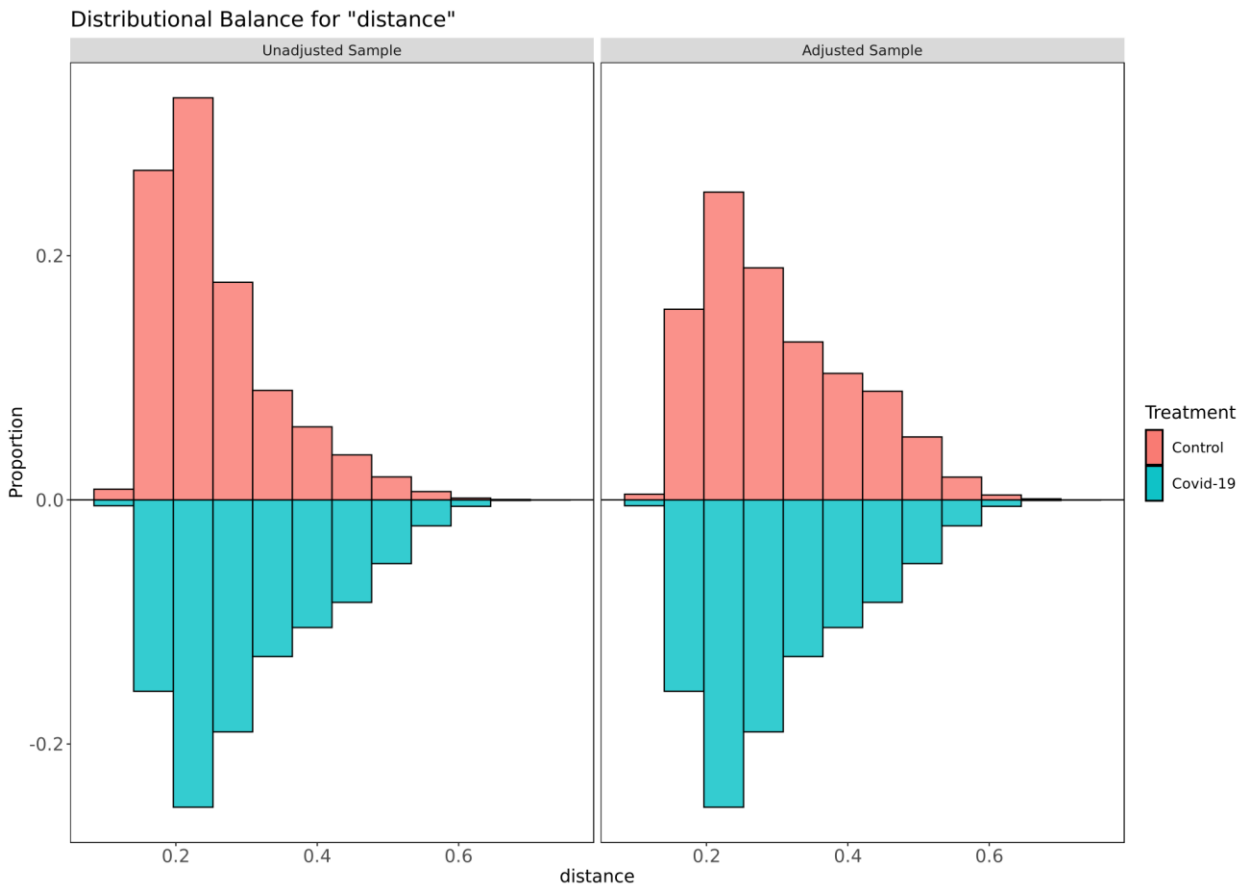

Supplement: Supplementary file 6 [file 1]
